# Supplementary material for: Experimental investigation of sulfite oxidation enhancement in a micro-pore aeration system
Source: Royal Society of Chemistry journal article supplement (doi:10.1039/c6ra19337d), 2016-01-01
Supplement: c6ra19337d1.pdf [file c6ra19337d1.pdf]

## **Supporting Information (SI)**

### **Experimental investigation of sulfite oxidation enhancement in a micro-pore aeration system**

Jun ZHANG, Cheng-hang ZHENG, Yong-xin ZHANG, Zhe-wei XU, Li WANG, Cun-jie LI,  
Xiang GAO\*

State Key Laboratory of Clean Energy Utilization, State Environmental Protection Engineering  
Center for Coal-fired Air Pollution Control, Zhejiang University, Hangzhou 310027, Zhejiang  
Province, China

Corresponding authors

\* Prof. Xiang Gao

State Key Laboratory of Clean Energy Utilization, Zhejiang University,  
Hangzhou 310027, Zhejiang Province, China

E-mail: [xgao1@zju.edu.cn](mailto:xgao1@zju.edu.cn)

Tel: +86 57187951335

**Contents: 4 Pages, 1 Definition Section, 1 Graph and 2 Tables.**

## S1. Definition of mean square error (MSE) and mean impact value (MIV)

In this study, MSE and MIV are defined as:

$$MSE = \frac{1}{N} \sum_{i=1}^N (T_i - T_j)^2$$

$$MIV = \frac{1}{N} \sum_{i=1}^N |A_i - B_i|$$

where  $N$  is the total number of the experimental samples used in the artificial neural network (ANN) model.  $T_i$  and  $Y_i$  refer to the target output data (experimental data) and actual output data (simulation data).  $A_i$  and  $B_i$  refer to the simulate result of the samples that one of the independent variables has been increased and decreased by 10%, respectively.

## S2. Different combinations of transfer functions

**Table S1.** Comparison of 6 combinations of transfer functions with a hidden layer of 10 neurons.

| Activation function |                    | MSE    |
|---------------------|--------------------|--------|
| Hidden layer        | Output layer       |        |
| Hiberbolic tangent  | Identity           | 0.0113 |
| Hiberbolic tangent  | Hiberbolic tangent | 0.0050 |
| Hiberbolic tangent  | Sigmoid            | 0.0047 |
| Sigmoid             | Identity           | 0.0083 |
| Sigmoid             | Hiberbolic tangent | 0.0277 |
| Sigmoid             | Sigmoid            | 0.0065 |

### S3. Optimization of neuron number in hidden layer

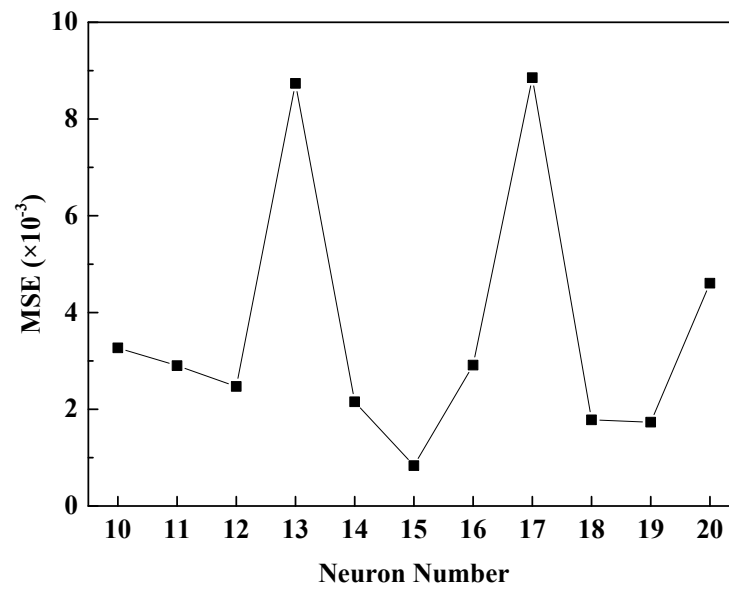

**Fig. S1.** MSE as a function of neuron number for the MLP neuron network.

#### S4. Weight matrices

**Table S2.** Weight matrices W1 (weights between the input and hidden layers) and W2 (weights between the hidden and output layer).

| Neuron number | W1               |             |           |            |                |          | W2                                  |
|---------------|------------------|-------------|-----------|------------|----------------|----------|-------------------------------------|
|               | Initial pH value | Temperature | Flow rate | Alkalinity | Aeration depth | Salinity | Sulfite oxidation performance index |
| 1             | 0.2907           | 0.6150      | 0.4853    | -0.0734    | 0.6362         | -0.3374  | -1.1340                             |
| 2             | 0.8167           | -0.4032     | 0.4313    | -0.0639    | 0.2159         | -0.1200  | -1.0583                             |
| 3             | -0.0409          | -0.0949     | 0.1669    | 0.4402     | 0.3387         | -0.1972  | 0.4981                              |
| 4             | -0.9192          | 0.6146      | -0.2119   | 0.0317     | -0.2287        | 0.3310   | 1.1013                              |
| 5             | 0.1280           | 0.5835      | 0.0751    | 0.1633     | -0.0307        | 0.2336   | -0.5291                             |
| 6             | -0.0999          | -0.2358     | -0.3418   | -0.6154    | 0.3877         | -0.4297  | 0.9553                              |
| 7             | -0.5744          | 0.6797      | -0.0100   | 0.3145     | 0.2527         | 0.5006   | 0.3730                              |
| 8             | -0.2594          | -0.5697     | 0.1412    | -0.3545    | 0.0184         | -0.0145  | 0.6508                              |
| 9             | 0.7793           | -0.2426     | -0.0700   | 0.2116     | 0.1250         | 0.0347   | -0.8801                             |
| 10            | -0.1581          | -0.3737     | 0.3428    | 0.4129     | -0.4161        | 0.5080   | 0.3236                              |
| 11            | -0.0161          | 0.0525      | 0.3662    | 0.0023     | -0.4094        | 0.3758   | 0.4674                              |
| 12            | -1.5691          | -0.3503     | 0.1903    | -0.0007    | -0.2152        | 0.4063   | -1.5011                             |
| 13            | 0.0170           | -0.8703     | 0.2014    | 0.5391     | 0.1367         | -0.0232  | 0.7025                              |
| 14            | 0.0026           | 0.3601      | -0.3915   | 0.4048     | 0.3661         | 0.1809   | -0.0540                             |
| 15            | 1.5768           | 0.1691      | 0.5378    | -0.2322    | 0.0164         | -0.0949  | 1.7206                              |
